# Supplementary material for: Extra-framework aluminium species in hydrated faujasite zeolite as investigated by two-dimensional solid-state NMR spectroscopy and theoretical calculations
Source: Royal Society of Chemistry journal article supplement (doi:10.1039/b915401a), 2010-01-01
Supplement: b915401a.pdf [file b915401a.pdf]

**Electronic Supplementary Information**  
**For**  
**Extra-Framework Aluminum Species in Hydrated Faujasite**  
**Zeolite as Investigated by Two-Dimensional Solid-State**  
**NMR Spectroscopy and Theoretical Calculations**

Submitted to journal- *Phys. Chem. Chem. Phys.* by:

Shenhui Li, Anmin Zheng, Yongchao Su, Hanjun Fang, Wanling Shen, Zhiwu Yu, Lei Chen and Feng Deng\*

*State Key Laboratory of Magnetic Resonance and Atomic and Molecular Physics,*  
*Wuhan Center for Magnetic Resonance, Wuhan Institute of Physics and Mathematics,*  
*the Chinese Academy of Sciences, Wuhan 430071, China*

---

\* To whom correspondence should be addressed.

Prof. Feng Deng, E-Mail: [dengf@wipm.ac.cn](mailto:dengf@wipm.ac.cn); Fax: +86-27-87199291;

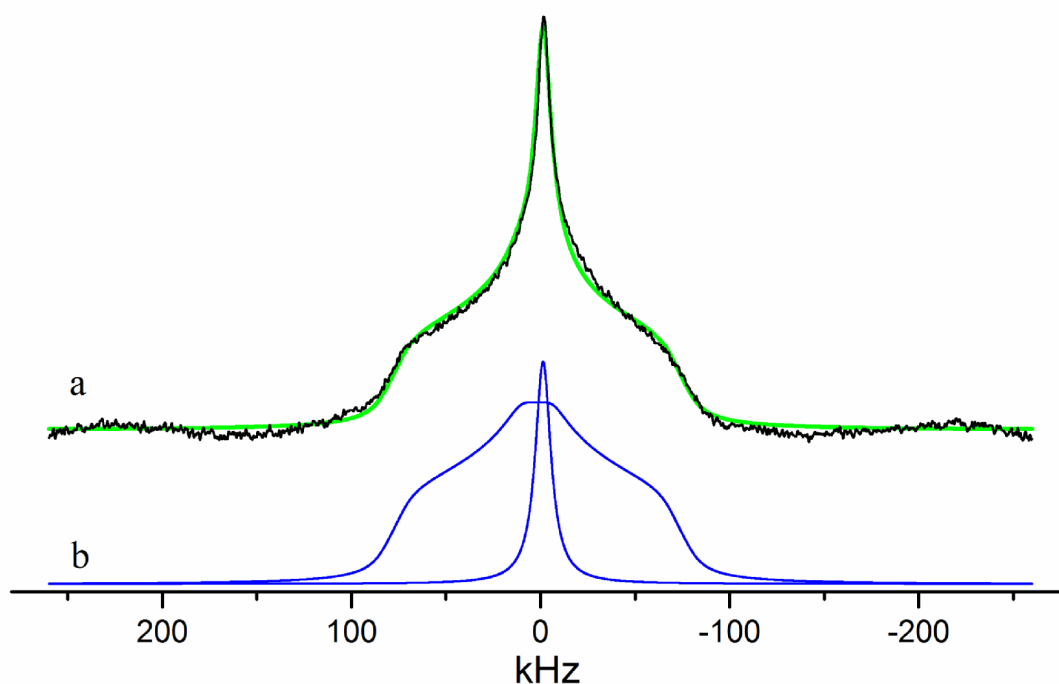

Fig. S1: Static  $^2\text{H}$  NMR spectrum of dealuminated HY zeolite with a deuteroxide loading of 30  $\text{D}_2\text{O}/\text{u.c.}$  (a) experimental and simulated spectra, (b) two components used in the spectral simulation.

### Experimental details of $^2\text{H}$ NMR

Static  $^2\text{H}$  NMR experiments were performed on a Varian Infinityplus-400 spectrometer equipped with a triple-resonance 7.5 mm probe. A solid echo pulse sequence [ $\pi/2 - \tau - \pi/2 - \tau - \text{acquire}$ ] was used to acquire static  $^2\text{H}$  NMR spectra, in which echo delay,  $\pi/2$  pulse length and recycle delay were 42  $\mu\text{s}$ , 6  $\mu\text{s}$  and 1s, respectively. Deconvolution of the  $^2\text{H}$  NMR spectrum was conducted using DMFIT software.
